# Supplementary material
Source: PubMed Central journal article supplement (PMC4885796)
Supplement: NIHMS755311-supplement-Suppl_table_1.pdf [file NIHMS755311-supplement-Suppl_table_1.pdf]

**Table S1: Immunocharacterization of PAR1<sup>+</sup> cells among GBM-derived TPCs**

| <b>Cell line</b> | <b>% PAR1 expression</b> | <b>% A2B5 in PAR1<sup>+</sup> cells</b> | <b>% CD133 in PAR1<sup>+</sup> cells</b> |
|------------------|--------------------------|-----------------------------------------|------------------------------------------|
| <b>GICL2</b>     | 86.07 ± 2.37             | 93.43 ± 3.042                           | 62.09 ± 14.6                             |
| <b>GICL5</b>     | 66.23 ± 1.68             | 99.42 ± 0.3014                          | 86.52 ± 8.7                              |
| <b>GICL8</b>     | 45.57 ± 4.983            | 92.94 ± 2.295                           | 85 ± 7.199                               |
| <b>GICL9</b>     | 59.02 ± 5.515            | 92.85 ± 1.65                            | 86.32 ± 9.099                            |
| <b>U87</b>       | 88.65 ± 0.05             |                                         |                                          |
| <b>U251</b>      | 8.6 ± 3.8                |                                         |                                          |
