# Supplementary material
Source: PubMed Central journal article supplement (PMC4885796)

Figure S2

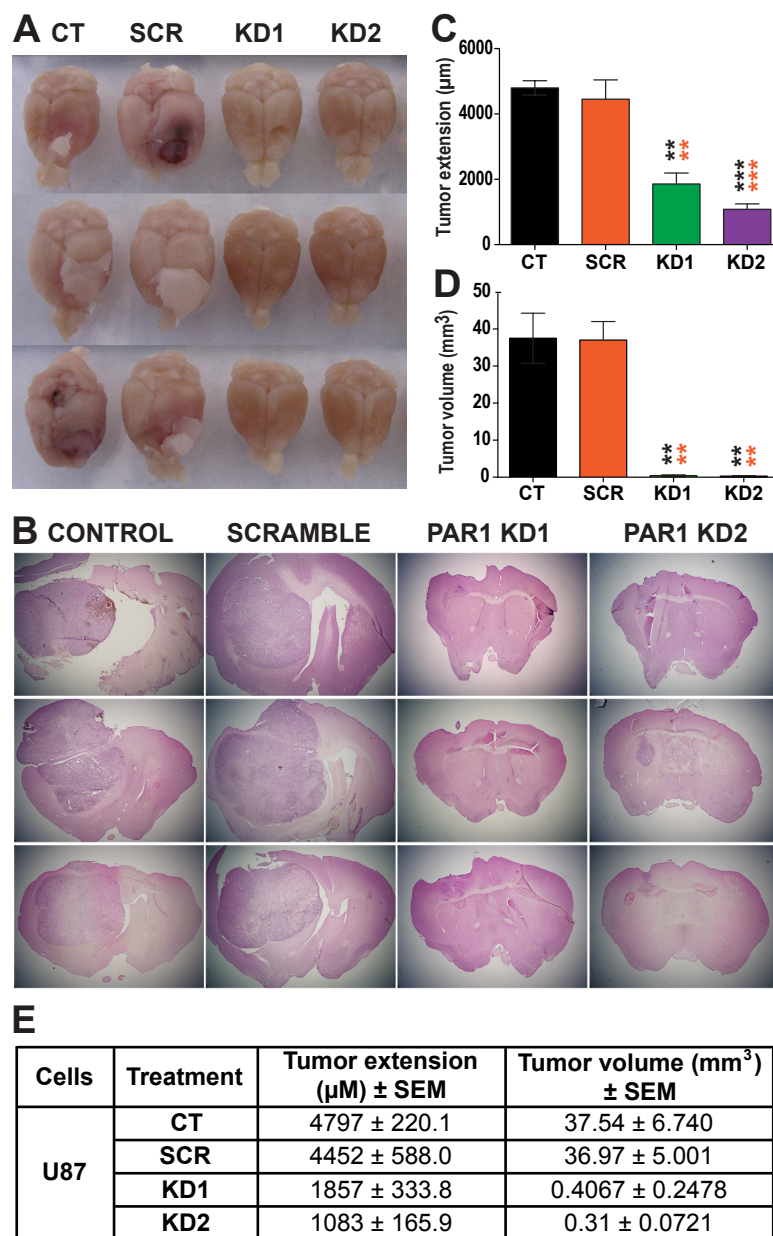

Supplement: NIHMS755311-supplement-Suppl_fig_2.pdf [file NIHMS755311-supplement-Suppl_fig_2.pdf]
